# Supplementary material for: Induced UV photon sensing properties in narrow bandgap CdTe quantum dots through controlling hot electron dynamics
Source: Royal Society of Chemistry journal article supplement (doi:10.1039/d3cp02424e), 2023-01-01
Supplement: d3cp02424e1.pdf [file d3cp02424e1.pdf]

## Supporting information

# Induced UV Photon Sensing Property in Narrow Bandgap CdTe Quantum Dots through Controlling Hot Electron Dynamics

*Thankappan Thrupthika<sup>1</sup>, Devaraj Nataraj<sup>1,2</sup>\*, Subramaniam Ramya<sup>1</sup>, Arumugam Sangeetha*

*<sup>1</sup>, T.Daniel Thangadurai<sup>3</sup>.*

<sup>1</sup> Quantum Materials & Devices Laboratory, Department of Physics, Bharathiar University,  
Coimbatore, Tamil Nadu 641 046, India.

<sup>2</sup> UGC-CPEPA Centre for Advanced Studies in Physics for the Development of Solar  
Energy Materials and Devices, Department of Physics, Bharathiar University, Coimbatore,  
Tamil Nadu, India 641 046

<sup>3</sup>KPR Institute of Engineering and Technology, Coimbatore, Tamil Nadu, India 641 407.

## Supporting Information

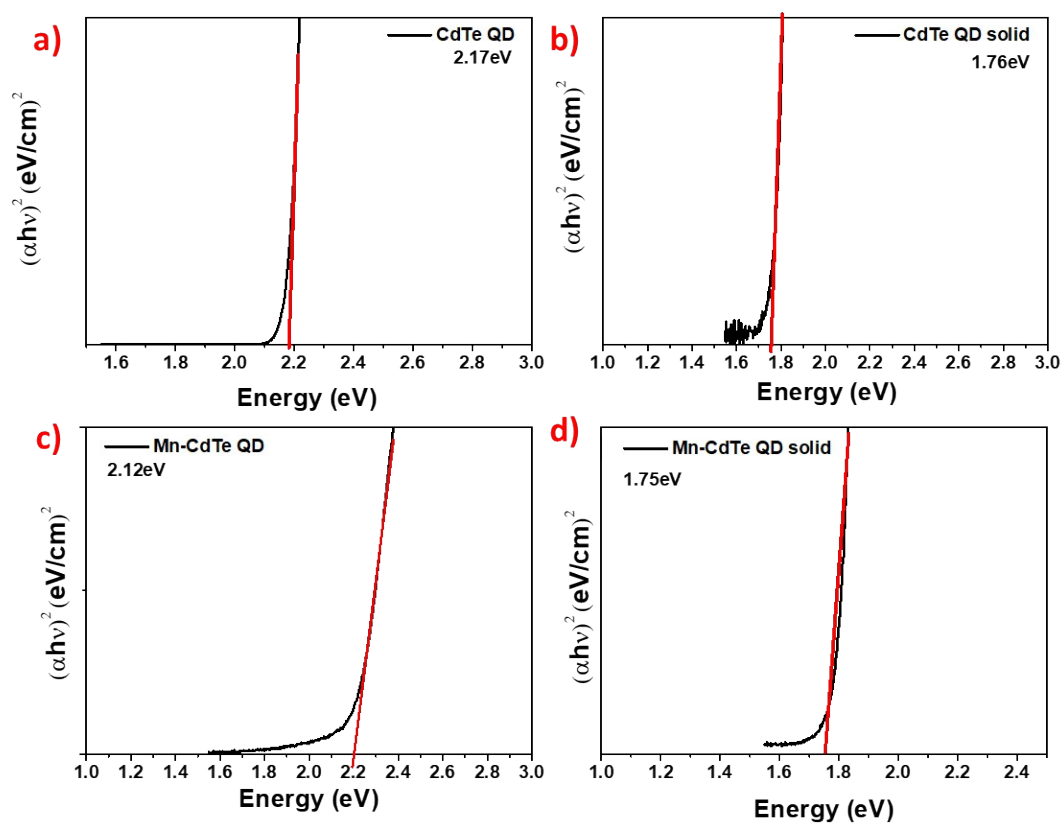

**Fig.S1.** The optical bandgap for CdTe & Mn-CdTe samples are, obtained by extrapolating  $(\alpha h\nu)^2$  versus  $h\nu$  plot

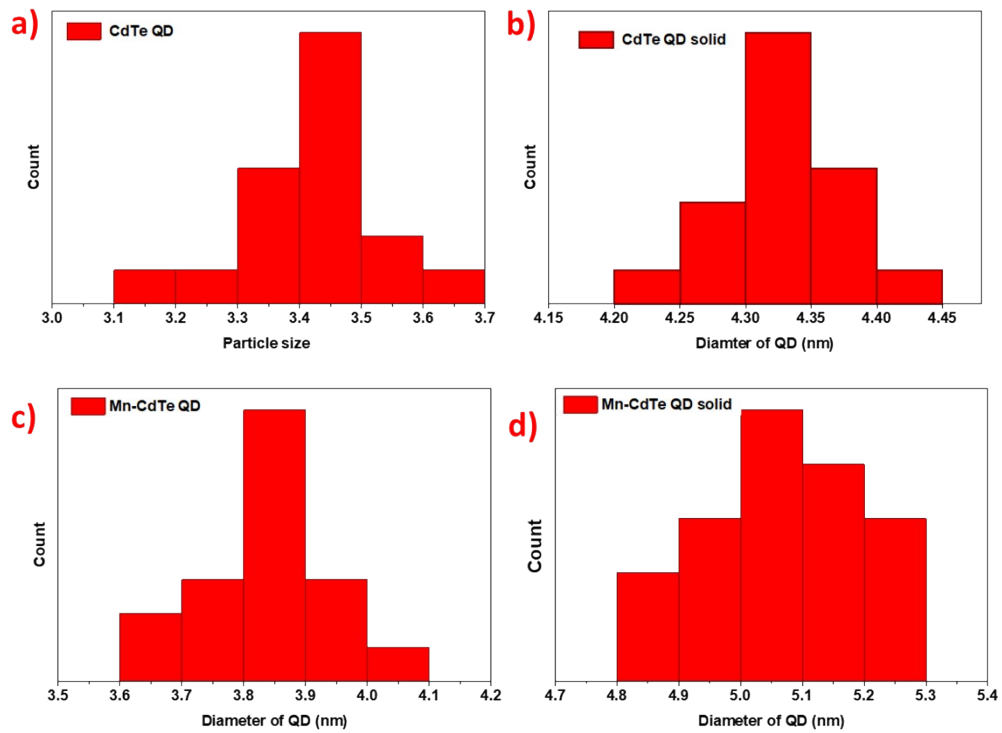

**Fig. S2.** Size histogram for CdTe QD, CdTe QD solid, Mn-CdTe QD and Mn-CdTe QD solid obtained from TEM imaging.

| Sl. No. | Sample name      | Average Size of the QDs (nm)<br>From TEM analysis | Average particle size calculation from UV-Vis absorption peak maximum position (nm) | Band Gap ( $E_g$ in eV)<br>By plot |
|---------|------------------|---------------------------------------------------|-------------------------------------------------------------------------------------|------------------------------------|
| 1       | CdTe QD          | 3.4nm                                             | 3.39nm                                                                              | 2.17                               |
| 2       | CdTe QD solid    | 4.3nm                                             | 4.32nm                                                                              | 1.76                               |
| 3       | Mn-CdTe QD       | 3.8nm                                             | 3.83nm                                                                              | 2.12                               |
| 4       | Mn-CdTe QD solid | 5nm                                               | 5.03nm                                                                              | 1.75                               |

**Table S1.** Average size calculation of prepared QD systems by TEM and Uv-visible absorption spectra

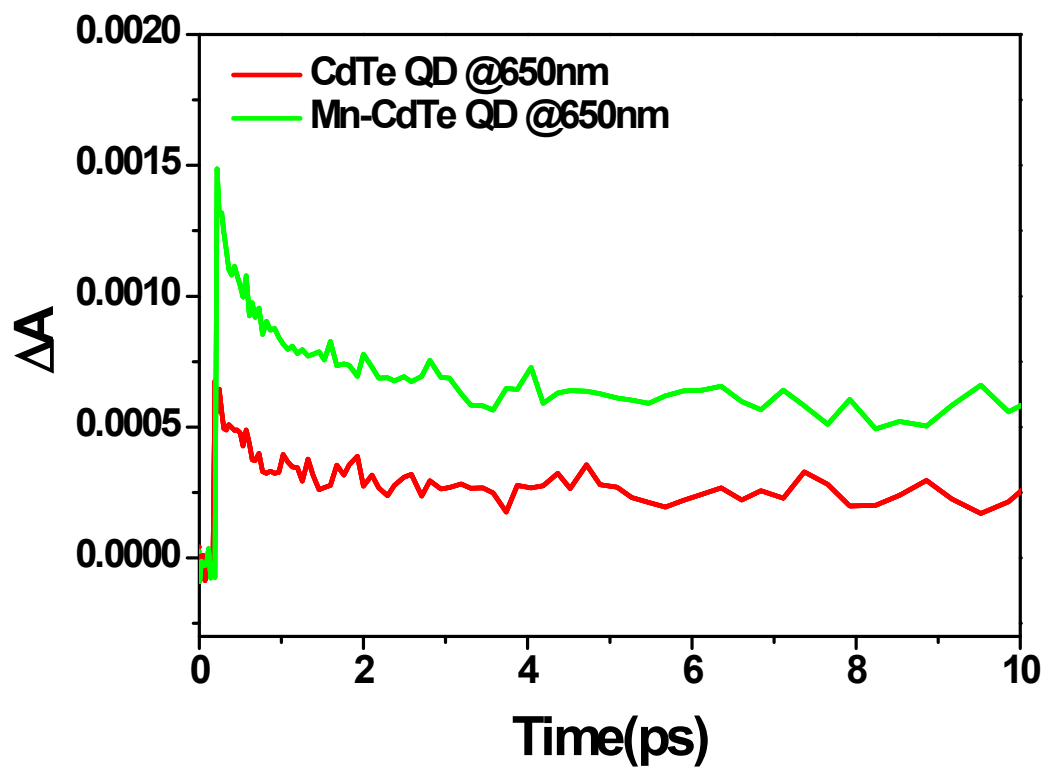

**Fig. S3.** The TA curve at the PA region at 650nm, obtained in CdTe & Mn-CdTe QDs. The magnitude of the PA region is larger for Mn-CdTe QD.

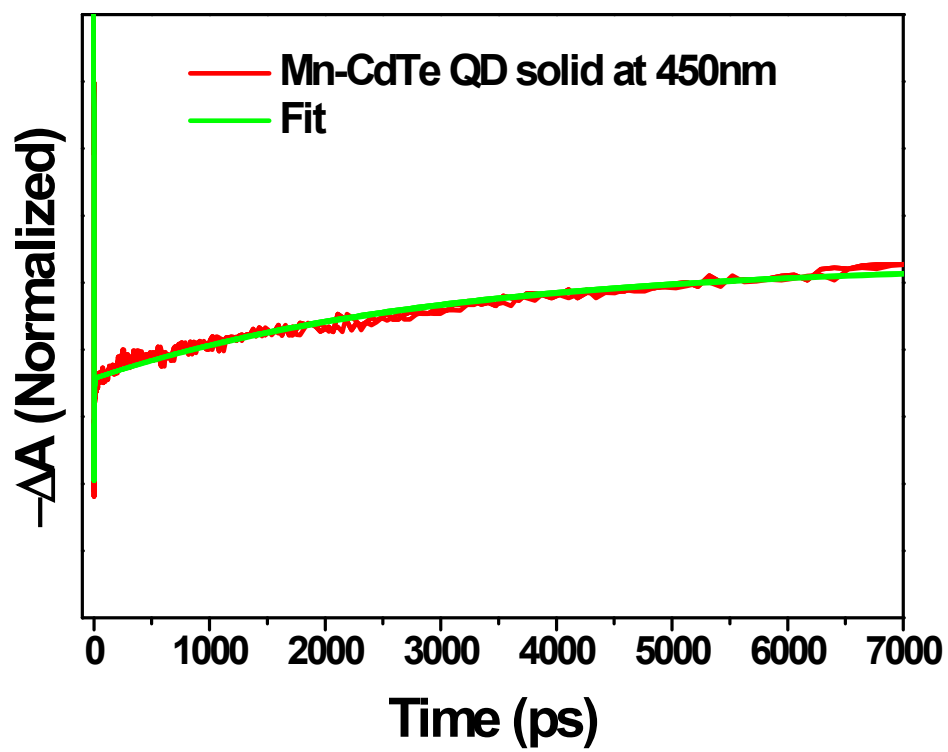

**Fig.S4.** The kinetic trace and fit curve obtained from TA spectrum for Mn-CdTe QD solid at 450nm.

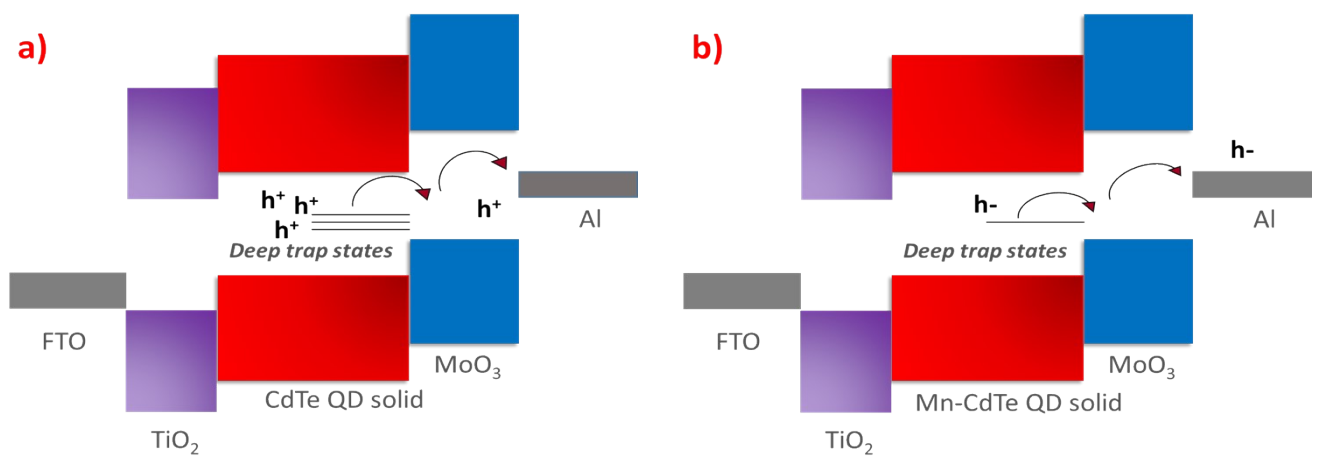

**Fig. S5.** Schematic diagram of CdTe QD solid a) and Mn-CdTe QD solid b) based photo sensitive device. (a) Shows the schematic representation of injection of holes from defect states at a bias voltage of 1V, and the holes are transporting through the high density deep trap states of the CdTe QD solid, upon no photon illumination. Whereas in Mn-CdTe QD solid (b) with low density of deep trap states, less number of deep trap assisted holes are transported through the device when no photons are illuminated which is the reason for the less magnitude of dark  $I_{\text{OFF}}$  current in forward bias.
